# Supplementary material for: The Influence of Preforming Protein Coronas on the Performance of Dengue NS1 Immunoassays
Source: Pharmaceutics. 2022 Nov 11;14(11):2439. doi: 10.3390/pharmaceutics14112439 (PMC9694804; doi:10.3390/pharmaceutics14112439)
Supplement: Supplementary file 1 [file pharmaceutics-14-02439-s001.zip › pharmaceutics-1993626-supplementary.pdf]

## Supporting Information

### The Influence of Preforming Protein Coronas on the Performance of Dengue NS1 Immunoassays

<sup>1</sup>Hom Rijal, <sup>1</sup>Laura Goggin, <sup>1</sup>Rachel Muriph, <sup>1</sup>Jason Evans\*, <sup>2,3</sup>Kimberly Hamad-Schifferli\*

<sup>1</sup>Department of Chemistry, University of Massachusetts Boston, Boston, MA 02125, USA

<sup>2</sup>Department of Engineering, University of Massachusetts Boston, Boston, MA 02125, USA

<sup>3</sup>School for the Environment, University of Massachusetts Boston, Boston, MA 02125, USA

\*Contact information: jason.evans@umb.edu (J.E.); kim.hamad@umb.edu (K.H.-S.)

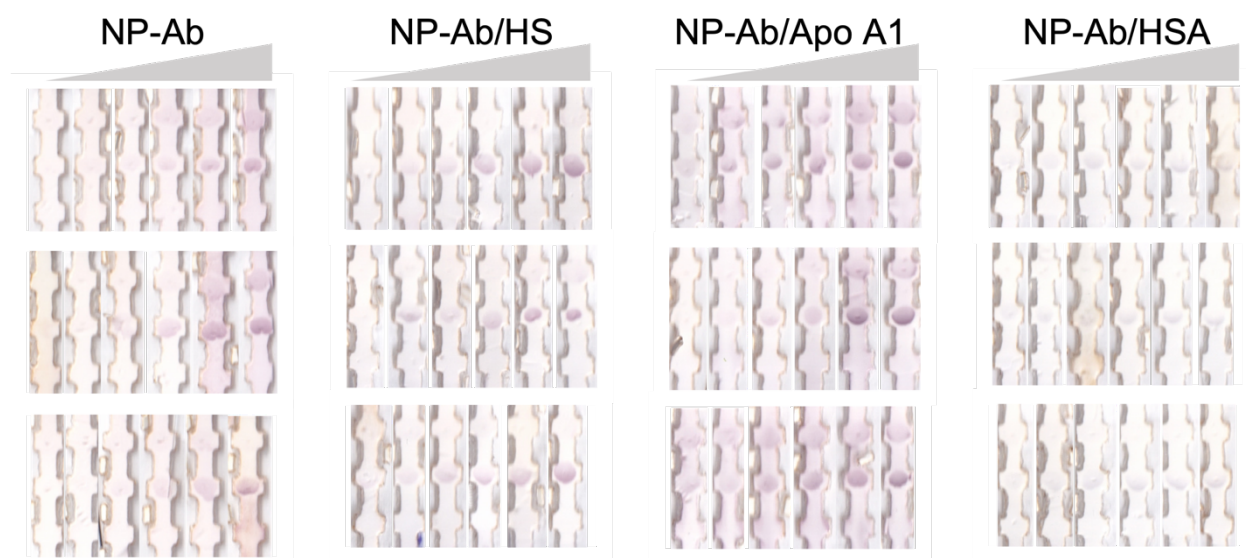

**Figure S1.** Images of strips of NP-Ab with different preformed coronas (no corona, HS, ApoA1, and HSA) run with increasing amounts of Dengue NS1. NS1 concentrations are 0 nM, 0.156 nM, 0.312 nM, 0.625 nM, 1.25 nM, and 2.5 nM.

**Table S1. Top 50 protein identifications from protein coronas formed in human serum derived from LC-MS/MS data.**

|    | <b>Protein</b>                           | <b>Biological Process</b>                                                                                                                                                                       |
|----|------------------------------------------|-------------------------------------------------------------------------------------------------------------------------------------------------------------------------------------------------|
| 1  | Albumin                                  | stress response;other biological processes                                                                                                                                                      |
| 2  | Alpha-1-antitrypsin                      | stress response;other biological processes                                                                                                                                                      |
| 3  | Immunoglobulin kappa constant            | cell organization and biogenesis;stress response;transport;signal transduction;other biological processes                                                                                       |
| 4  | Apolipoprotein A-I                       | cell cycle OR cell proliferation;cell organization and biogenesis;protein metabolism;other metabolic processes;transport;developmental processes;signal transduction;other biological processes |
| 5  | Immunoglobulin kappa light chain         | other biological processes                                                                                                                                                                      |
| 6  | Complement C3                            | cell-cell signaling;cell organization and biogenesis;protein metabolism;other metabolic processes;stress response;developmental processes;signal transduction;other biological processes        |
| 7  | Serotransferrin                          | cell organization and biogenesis;stress response;transport;developmental processes;signal transduction;other biological processes                                                               |
| 8  | Immunoglobulin heavy constant gamma 1    | cell organization and biogenesis;stress response;transport;signal transduction;other biological processes                                                                                       |
| 9  | Immunoglobulin gamma-1 heavy chain       | other biological processes                                                                                                                                                                      |
| 10 | Alpha-2-macroglobulin                    | stress response;developmental processes;other biological processes                                                                                                                              |
| 11 | Immunoglobulin lambda constant 2         | cell organization and biogenesis;stress response;transport;signal transduction;other biological processes                                                                                       |
| 12 | Immunoglobulin lambda constant 3         | cell organization and biogenesis;stress response;transport;signal transduction;other biological processes                                                                                       |
| 13 | Haptoglobin                              | protein metabolism;other metabolic processes;stress response;other biological processes                                                                                                         |
| 14 | Immunoglobulin lambda-1 light chain      | other biological processes                                                                                                                                                                      |
| 15 | Immunoglobulin lambda-like polypeptide 5 | cell organization and biogenesis;stress response;transport;signal transduction;other biological processes                                                                                       |
| 16 | Immunoglobulin lambda constant 1         | cell organization and biogenesis;stress response;transport;signal transduction;other biological processes                                                                                       |
| 17 | Alpha-1-antichymotrypsin                 | stress response;other biological processes                                                                                                                                                      |
| 18 | Immunoglobulin lambda constant 7         | cell organization and biogenesis;stress response;transport;signal transduction;other biological processes                                                                                       |

|    |                                       |                                                                                                                                                                                                                 |
|----|---------------------------------------|-----------------------------------------------------------------------------------------------------------------------------------------------------------------------------------------------------------------|
| 19 | Immunoglobulin lambda constant 6      | cell organization and biogenesis;stress response;transport;signal transduction;other biological processes                                                                                                       |
| 20 | Alpha-1-acid glycoprotein 1           | stress response;other biological processes                                                                                                                                                                      |
| 21 | Transthyretin                         | other metabolic processes;transport;signal transduction                                                                                                                                                         |
| 22 | Desmoplakin                           | cell adhesion;cell organization and biogenesis;protein metabolism;other metabolic processes;stress response;developmental processes;other biological processes                                                  |
| 23 | Immunoglobulin heavy constant gamma 4 | cell organization and biogenesis;stress response;transport;signal transduction;other biological processes                                                                                                       |
| 24 | Alpha-1-acid glycoprotein 2           | stress response;other biological processes                                                                                                                                                                      |
| 25 | Apolipoprotein A-II                   | cell organization and biogenesis;protein metabolism;other metabolic processes;stress response;transport;other biological processes                                                                              |
| 26 | Immunoglobulin heavy constant gamma 3 | cell organization and biogenesis;stress response;transport;signal transduction;other biological processes                                                                                                       |
| 27 | Immunoglobulin heavy constant alpha 1 | cell organization and biogenesis;stress response;transport;signal transduction;other biological processes                                                                                                       |
| 28 | Immunoglobulin heavy constant gamma 2 | cell organization and biogenesis;stress response;transport;signal transduction;other biological processes                                                                                                       |
| 29 | 9 Actin, cytoplasmic 1 "              | cell organization and biogenesis;protein metabolism;other metabolic processes;stress response;transport;developmental processes;other biological processes                                                      |
| 30 | 1 Actin, cytoplasmic 2 "              | cell organization and biogenesis;stress response;transport;developmental processes;other biological processes                                                                                                   |
| 31 | Alpha-enolase                         | other metabolic processes;other biological processes                                                                                                                                                            |
| 32 | Haptoglobin-related protein           | protein metabolism;other metabolic processes;stress response;other biological processes                                                                                                                         |
| 33 | Clusterin                             | cell cycle OR cell proliferation;cell organization and biogenesis;protein metabolism;other metabolic processes;stress response;transport;developmental processes;signal transduction;other biological processes |
| 34 | Protein S100-A9                       | cell adhesion;cell-cell signaling;protein metabolism;other metabolic processes;stress response;developmental processes;other biological processes                                                               |
| 35 | Junction plakoglobin                  | cell adhesion;cell organization and biogenesis;other biological processes                                                                                                                                       |
| 36 | Desmoglein-1                          | cell adhesion;cell organization and biogenesis;other biological processes                                                                                                                                       |
| 37 | Hemopexin                             | protein metabolism;other metabolic processes;transport;other biological processes                                                                                                                               |
| 38 | Immunoglobulin kappa variable 1D-33   | other biological processes                                                                                                                                                                                      |

|    |                                     |                                                                                                                                         |
|----|-------------------------------------|-----------------------------------------------------------------------------------------------------------------------------------------|
| 39 | Protein S100-A7                     | stress response;developmental processes;other biological processes                                                                      |
| 40 | Prothrombin                         | protein metabolism;other metabolic processes;stress response;signal transduction;other biological processes                             |
| 41 | Glial fibrillary acidic protein     | cell organization and biogenesis;other metabolic processes;stress response;transport;developmental processes;other biological processes |
| 42 | Fructose-bisphosphate aldolase A    | cell organization and biogenesis;other metabolic processes;other biological processes                                                   |
| 43 | POTE ankyrin domain family member E |                                                                                                                                         |
| 44 | Antithrombin-III                    | stress response;other biological processes                                                                                              |
| 45 | Alpha-1B-glycoprotein               |                                                                                                                                         |
| 46 | Plasma protease C1 inhibitor        | stress response;other biological processes                                                                                              |
| 47 | Alpha-2-HS-glycoprotein             | stress response;transport;developmental processes;other biological processes                                                            |
| 48 | Complement C4-B                     | stress response;other biological processes                                                                                              |
| 49 | Complement C4-A                     | stress response;other biological processes                                                                                              |
| 50 | B-cell receptor CD22                | cell adhesion;other biological processes                                                                                                |

#### RP-nLC/ESI-MS conditions

The nLC system was operated at a flow rate of 300 nL/min using the following gradient: 0-4 min 0-8% B, 4-124 min 8-30 % B, 124-139 min 30-90 % B, 139-149 min 90 % B, 149-169 min at 90-0 % B, and 169-180 min 0 % B for column re-equilibration. Mobile phase solvents were purchased from Fisher Chemical (Fair Lawn, NJ, USA) and were Optima LC/MS Grade. Mobile phase A was 96.1:3.9 0.1% FA in water/0.1 % FA in ACN. Mobile phase B was 80.0:20.0 0.1 % FA in water/0.1% FA in ACN. The samples were first desalted on a Thermo Fisher Scientific Acclaim PepMap 100 C18 HPLC column (3 µm particle size, 75 µm x 2 cm, 100 Å) prior to separation on a Thermo Fisher Scientific PepMap RSLC C18 EASY-Spray Column (3 µm particle size, 75 µm x 15 cm, 100 Å).

The Orbitrap Fusion Lumos mass spectrometer was operated in the peptide mode. The global settings were as follows: ion source type NSI, positive voltage of 1900 V, and an Ion Transfer Tube Temp of 275 °C. Ions for the MS scans were detected in the Orbitrap with a resolution of 120,000. The mass range was normal, quadrupole isolation was checked, and the scan range was set to 400-1600 m/z. The RF lens was set to 30 % and the AGC target and maximum injection time were 2.0e5 and 100 ms, respectively. One microscan per scan was taken.

The following filters were utilized: MIPS, Intensity, Charge State, and Dynamic Exclusion. The MIPS filter was set to peptide. The intensity filter was set to an intensity threshold of 8.0e3. The charge state filter was set to include charge states 2-6. A dynamic

exclusion filter was configured to exclude ions after 1 time for a duration of 30 seconds with a  $\pm 10$  ppm mass tolerance. Isotopes were excluded. Following the dynamic exclusion filter, the method branched into two ddMS<sup>2</sup> legs with respective charge state filters. CID was collected on ions with a charge state between 2 and 3 while EThcD was collected on ions with a charge state of 3 to 6.

The first leg consisted of the charge state filter set to include charge states 2-3 and was applied before the ddMS<sup>2</sup> IT CID node. Ions for the ddMS<sup>2</sup> CID were isolated in the quadrupole with a with an isolation window of 1.2 m/z. Ions were fragmented via CID with a fixed collision energy of 35% and an activation time of 10 ms. The Q parameter for the CID activation was set 0.25. The ions were detected in the Ion Trap with an Auto: m/z Normal scan range and a rapid scan rate. The first mass was set to 100 m/z. The AGC target and maximum injection time were set to 2.0e4 and 50 ms. One microscan per scan was taken.

The second leg consisted of the charge state filter set to include charge states 3-6 and was applied before the ddMS<sup>2</sup> IT EThcD node. Ions for the ddMS<sup>2</sup> EThcD were isolated in the quadrupole with an isolation window of 1.2 m/z. Ions were fragmented via ETD using calibrated charge dependent EtD parameters and ETD supplemental activation. EThcD was used with a collision energy of 25%. The ions were detected in the Ion Trap with an Auto: m/z Normal scan range and a rapid scan rate. The first mass was set to 120 m/z. The AGC target and maximum injection time were set to 2.0e4 and 50 ms. One microscan per scan was taken. The cycle time for the data-dependent acquisition was set to 3 sec.

#### Immunoprobe preparation

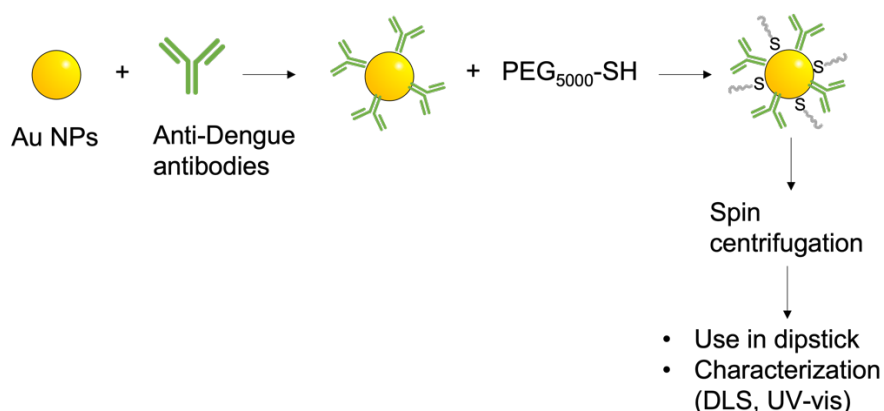

Figure S2. Procedure for NP-antibody conjugation (immunoprobe preparation).

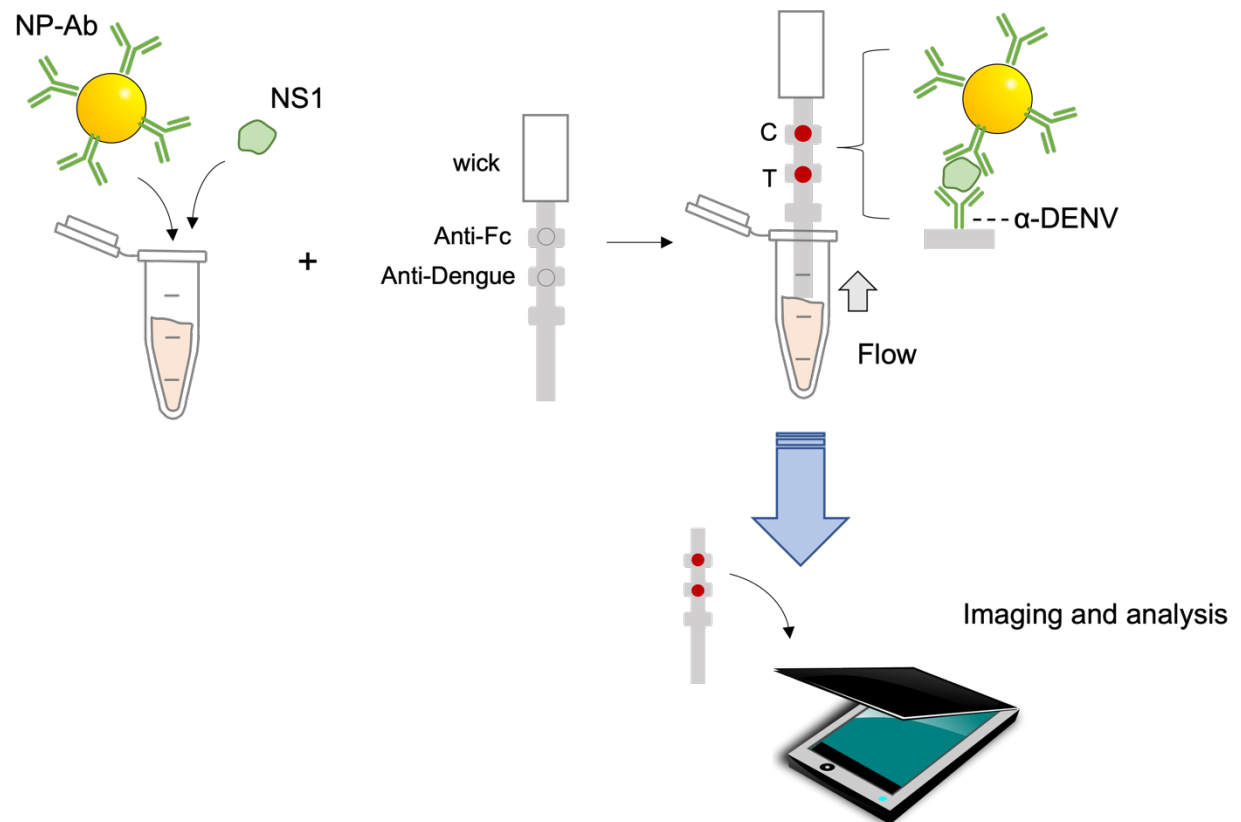

Figure S3. Procedure for running a dipstick assay as described in Methods.
